# Supplementary material for: GASZ Is Essential for Male Meiosis and Suppression of Retrotransposon Expression in the Male Germline
Source: PLoS Genet. 2009 Sep 4;5(9):e1000635. doi: 10.1371/journal.pgen.1000635 (PMC2727916; doi:10.1371/journal.pgen.1000635)
Supplement: Table S3 — miRNAs missannotated as piRNAs. Sequences annotated as piRNAs that increased in abundance in Gasz−/− testes were compared to the map positions (UCSC mm9) of mouse pre-miRNAs. The majority of overlapping sequences mapped to a large microRNA cluster on the X chromosome. The “piRNA” reads observed and the similar pre-miRNA with mature miRNA sequences in bold are provided. Most of the sequences are identical with mature miRNAs or differ by 1–2 nt at the 3′ end. We also observed several piRNAs mapping to the strand of the stem-loop opposite to known miRNAs to which we assigned putative designations. Novel testis piRNA t27 is described in [74]. (0.03 MB XLS) [file pgen.1000635.s014.xls]

## Sheet: Sheet1
Accession	piRNA position	piRNA Cluster	"piRNA" sequence	Overlapping pre-miRNA position	partial pre-miRNA sequence (known miRNAs in bold)	call
DQ687596	2:10395568-10395590 [+]	Y	UAAGUGCGUGCAUGUAUAUGUGU	miR-467c 2:10395558-10395654 [+]	CCUUUGUGCAUAAGUGCGUGCAUGUAUAUGUGUGUAUAUUUUAUGCAUAUACAUACACACACCUAUACACACAUGCACA	467c variant
DQ721750	2:10427359-10427379 [+]	N	UAAGUGUGAGCAUGUAUAUGU	miR-467e 2:10427348-10427434 [+]	GCCUGUGUGCAUAAGUGUGAGCAUGUAUAUGUGUGUAUAUUUUAUGCAUAUACAUACACACACCUAUAUACACAUGCAC	467e variant
DQ718174	2:10430946-10430967 [+]	N	AUAGUUGUGUGUGGAUGUGUGU	miR-669c 2:10430923-10431031 [+]	CCUCCAUGUAUGUGCAUGUGUGUAUAGUUGUGUGUGGAUGUGUGUAUUUGCAUAUAAAUAACAUACACACACACACACA	669c
DQ719430	2:117010887-117010909 [+]	N	GCACUGAGAUGGGAGUGGUGUAA	miR-674 2:117010863-117010962 [+]	GGCCUAGUCAUCACCCUGAGCCUUGCACUGAGAUGGGAGUGGUGUAAGGCUCAGGUAUGCACAGCUCCCAUCUCAGAAC	674 variant
DQ701020	4:94331897-94331915 [+]	N	UGAACUAUUGCAGUAGCCU	miR-872 4:94331848-94331928 [+]	AACUUGUUAGAAGGUUACUUGUUAGUUCAGGACCUCAUUACUUUCUGCCUGAACUAUUGCAGUAGCCUCCUAACUGGUU	872-3p?
DQ696996	11:65548301-65548322 [-]	N	UGCGGGGCUAGGGCUAACAGCA	miR-744 11:65548235-65548334 [-]	GGCUGGGCAAGGUGCGGGGCUAGGGCUAACAGCAGUCUUACUGACGGUUUCCUGGAAACCACACACAUGCUGUUGCCAC	744 variant
DQ713872	X:6825545-6825566 [-]	N	CCUCCCACACCCAAGGCUUGCA	miR-532 X:6825528-6825623 [-]	CAGAUUUGCUUUUUCUCUUCCAUGCCUUGAGUGUAGGACCGUUGACAUCUUAAUUACCCUCCCACACCCAAGGCUUGCA	532-3p
DQ708952	X:6825582-6825603 [-]	N	CAUGCCUUGAGUGUAGGACCGU	miR-532 X:6825528-6825623 [-]	CAGAUUUGCUUUUUCUCUUCCAUGCCUUGAGUGUAGGACCGUUGACAUCUUAAUUACCCUCCCACACCCAAGGCUUGCA	532-5p
DQ704700	X:64029936-64029956 [-]	N	GAAAGACACCAAGCUGAGUAG	miR-743a X:64029932-64029993 [-]	CUGUAUUCAGAUUGGUGCCUGUCAUGUUUAUAAGAAUGAAAGACACCAAGCUGAGUAGAGUA	743a variant
DQ689719	X:64030441-64030462 [-]	N	GAAAGACAUCAUGCUGAAUAGA	miR-743b X:64030431-64030507 [-]	UGCAGUGCUGUGUUCAGACUGGUGUCCAUCAUGUGAAAUAUUUGUGAAAGACAUCAUGCUGAAUAGAGUAAGGCCCA	743b-3p?
DQ711577	X:64030476-64030497 [-]	Y	UGUUCAGACUGGUGUCCAUCAU	miR-743b X:64030431-64030507 [-]	UGCAGUGCUGUGUUCAGACUGGUGUCCAUCAUGUGAAAUAUUUGUGAAAGACAUCAUGCUGAAUAGAGUAAGGCCCA	743b-5p variant
DQ710819	X:64033944-64033964 [-]	Y	UAACUGCAACAGCUCUCAGUA	miR-883a X:64033933-64034008 [-]	GCACUAUAAUGCUGAGAGAAGUAGCAGUUACUUUAUUCUAUAAGUAACUGCAACAGCUCUCAGUAUUGUAAGGCUC	883a-3p variant
DQ723965	X:64033979-64033999 [-]	Y	UGCUGAGAGAAGUAGCAGUUA	miR-883a X:64033933-64034008 [-]	GCACUAUAAUGCUGAGAGAAGUAGCAGUUACUUUAUUCUAUAAGUAACUGCAACAGCUCUCAGUAUUGUAAGGCUC	883a-5p variant
DQ685028	X:64043074-64043096 [-]	Y	UAACUGCAACAUCUCUCAGUAUU	miR-883b X:64043065-64043142 [-]	UGCAAUGCAUUACUGAGAAUGGGUAGCAGUCACUUUGUACUAUGAGUAACUGCAACAUCUCUCAGUAUUGUAAGGUUC	883b-3p variant
DQ693999	X:64049983-64050006 [-]	Y	UGAGAGAUGCCAUUCUAUGUAGAU	mir-t27 X:64050022-64050044 [-]	CAUGUGCAUUGAUCUACGUAGAUUGGUACCUAUCAUGUAAAUCAUGUAAGCAUGAGAGAUGCCAUUCUAUGUAGAUUAA	t27-3p
DQ722398	X:64050022-64050044 [-]	Y	UACGUAGAUUGGUACCUAUCAUG	mir-t27 X:64050022-64050044 [-]	CAUGUGCAUUGAUCUACGUAGAUUGGUACCUAUCAUGUAAAUCAUGUAAGCAUGAGAGAUGCCAUUCUAUGUAGAUUAA	t27-5p
DQ701156	X:64053715-64053736 [-]	Y	UACUCCAUCCUCUCUGAGUAGA	miR-880 X:64053705-64053782 [-]	UGCACUGCAAUACUCAGAUUGAUAUGAGUCACUUCCUAUUGCAUGUUACUCCAUCCUCUCUGAGUAGAGUAAGGCACA	880
DQ695724	X:64054693-64054714 [-]	Y	GCAUGACACCACACUGGGUAGA	miR-878 X:64054683-64054760 [-]	UGCAAUGCUUUAUCUAGUUGGAUGUCAAGACACGUGAAACUUAAGUGCAUGACACCACACUGGGUAGAGGAGGGCUCA	878-3p
DQ712982	X:64055129-64055150 [-]	Y	AACUGUGUCUUUUCUGAAUAGA	miR-881 X:64055119-64055196 [-]	UGCAGUACAAUAUUCAGAGAGAUAACAGUCACAUCUUUUCUAAAGUAACUGUGUCUUUUCUGAAUAGAGUAAUGUUCA	881-3p?
DQ686428	X:64055165-64055186 [-]	Y	UAUUCAGAGAGAUAACAGUCAC	miR-881 X:64055119-64055196 [-]	UGCAGUACAAUAUUCAGAGAGAUAACAGUCACAUCUUUUCUAAAGUAACUGUGUCUUUUCUGAAUAGAGUAAUGUUCA	881-5p variant
DQ694926	X:64063613-64063635 [-]	Y	UGACUGGCACCAUUCUGGAUAAU	miR-871 X:64063603-64063679 [-]	UGCAGUGCUCUAUUCAGAUUAGUGCCAGUCAUGUGAAAUACAUAUGACUGGCACCAUUCUGGAUAAUGUAAUGCUCA	871-3p?
DQ716809	X:64063646-64063669 [-]	Y	UAUUCAGAUUAGUGCCAGUCAUGU	miR-871 X:64063603-64063679 [-]	UGCAGUGCUCUAUUCAGAUUAGUGCCAGUCAUGUGAAAUACAUAUGACUGGCACCAUUCUGGAUAAUGUAAUGCUCA	871-5p variant
DQ719784	X:101311569-101311589 [-]	N	UGAGGUUGGUGUACUGUGUGU	miR-672 X:101311514-101311613 [-]	GAUGGUGAUCUAGCCCUUUAGUUUUGAGGUUGGUGUACUGUGUGUGAGUAUACAUAUUUAUCACACACAGUCACUAUCU	672 variant
